# Supplementary material for: Dynamics of carbon and nitrogen storage in two typical plantation ecosystems of different stand ages on the Loess Plateau of China
Source: PeerJ. 2019 Sep 18;7:e7708. doi: 10.7717/peerj.7708 (PMC6754723; doi:10.7717/peerj.7708)
Supplement: Supplemental Information 1 [file peerj-07-7708-s001.xlsx]

## Sheet: Sheet1
Table S1 Soil organic carbon content and organic carbon storage in the different soil layers at each stand age of Robinia pseudoacacia
		carbon content(g kg-1)								carbon storage(Mg ha-1)
Age		0-20cm	20-40cm	40-60cm	60-80cm	80-100cm		Age		0-20cm	20-40cm	40-60cm	60-80cm	80-100cm
0	T1	9.03	5.39	2.69	2.45	2.31		0	T1	26.49	14.01	6.92	6.4	6.1
	T2	8.72	5.96	2.89	2.33	2.57			T2	28.91	15.89	7.98	7.2	6.89
	T3	8.61	4.98	2.46	3.01	2.47			T3	24.84	13.01	5.53	5.49	5.09
	T4	9.76	5.23	2.72	2.01	1.89			T4	25.5	13.13	7.25	6.51	6.32
8	T1	7.33	4.52	2.98	2.52	2.26		8	T1	22.91	13.57	6.32	6.3	5.93
	T2	7.03	4.74	3.19	2.62	1.99			T2	25.31	15.49	5.01	5.69	5.29
	T3	6.92	3.99	2.86	2.02	2.42			T3	20.91	12.44	7.44	7.02	7.03
	T4	8.04	4.83	2.89	2.92	2.37			T4	22.51	12.78	6.51	6.19	5.47
20	T1	11.34	8.6	5.44	4.43	4.14		20	T1	34.51	22.05	17.54	14.42	10.07
	T2	12.05	8.96	6.01	5.13	4.51			T2	37.78	24.03	19.28	16.03	13.03
	T3	10.39	7.97	5.58	4.02	4.15			T3	29.24	17.37	15.02	12.11	8.11
	T4	11.58	8.87	4.73	4.14	3.76			T4	36.51	24.75	18.32	15.12	9.07
38	T1	13.11	10.91	9.98	9.29	8.22		38	T1	45.76	32.47	25.85	20.08	17.99
	T2	14.19	11.11	10.47	10.08	8.9			T2	50.98	36.92	30.13	23.28	21.48
	T3	12.85	10.33	9.62	9.74	7.65			T3	42.21	29.87	23.01	17.07	15.6
	T4	12.29	11.29	9.85	8.08	8.11			T4	41.11	30.62	24.41	19.89	16.89
58	T1	15.01	11.12	11.05	9.49	8.45		58	T1	52.33	44.68	35.97	20.27	19.36
	T2	15.58	11.82	11.69	10.05	9.17			T2	58.01	48.99	40.22	17.98	16.81
	T3	14.09	11.15	11.08	10.19	7.82			T3	54.37	40.98	37.94	18.68	18.26
	T4	15.36	10.39	10.38	8.23	8.36			T4	44.61	44.07	29.75	24.15	23.01
