# Supplementary material for: Dynamics of carbon and nitrogen storage in two typical plantation ecosystems of different stand ages on the Loess Plateau of China
Source: PeerJ. 2019 Sep 18;7:e7708. doi: 10.7717/peerj.7708 (PMC6754723; doi:10.7717/peerj.7708)
Supplement: Supplemental Information 2 [file peerj-07-7708-s002.xlsx]

## Sheet: Sheet1
Table S2 Soil nitrogen content and storage in the different soil layers at each stand age of Robinia pseudoacacia
		nitrogen content(g kg-1)							nitrogen storage(Mg ha-1)
Age		0-20cm	20-40cm	40-60cm	60-80cm	80-100cm		Age		0-20cm	20-40cm	40-60cm	60-80cm	80-100cm
0	T1	0.69	0.39	0.23	0.22	0.2		0	T1	1.68	1.04	0.59	0.58	0.49
	T2	0.81	0.43	0.29	0.27	0.26			T2	1.94	1.18	0.68	0.76	0.58
	T3	0.62	0.43	0.25	0.18	0.18			T3	1.23	0.71	0.54	0.45	0.44
	T4	0.64	0.31	0.16	0.21	0.17			T4	1.87	1.23	0.55	0.53	0.45
8	T1	0.61	0.363	0.2148	0.2046	0.18		8	T1	1.5965	0.94315	0.57848	0.55202	0.48587
	T2	0.7	0.35	0.26	0.17	0.14			T2	1.89	1.19	0.63	0.51	0.59
	T3	0.54	0.43	0.24	0.25	0.22			T3	1.77	0.76	0.65	0.67	0.45
	T4	0.59	0.31	0.15	0.17	0.19			T4	1.13	0.89	0.45	0.47	0.41
20	T1	0.82	0.66828	0.4894	0.3998	0.4		20	T1	1.8102	1.63685	1.37255	1.0949	1.08007
	T2	0.87	0.78	0.45	0.45	0.48			T2	2.23	2.01	1.78	1.35	1.28
	T3	0.75	0.6	0.58	0.33	0.35			T3	1.65	1.51	1.02	0.97	0.89
	T4	0.84	0.63	0.42	0.43	0.37			T4	1.56	1.39	1.31	0.95	1.07
38	T1	0.94	0.84617	0.7912	0.7246	0.65		38	T1	2.0128	1.86006	1.6722	1.58363	1.49873
	T2	0.85	0.91	0.81	0.81	0.68			T2	2.51	2.19	1.79	1.88	1.75
	T3	0.99	0.85	0.68	0.73	0.57			T3	1.51	1.63	1.92	1.25	1.39
	T4	0.98	0.76	0.9	0.65	0.69			T4	2.02	1.76	1.3	1.62	1.35
58	T1	1.12	0.92035	0.8252	0.7916	0.63		58	T1	2.25437	1.97104	1.8045	1.68014	1.39333
	T2	1.35	0.99	0.92	0.87	0.62			T2	2.69	2.35	2.21	2	1.67
	T3	1.03	0.84	0.84	0.69	0.7			T3	1.68	1.52	1.43	1.46	1.09
	T4	0.98	0.93	0.73	0.82	0.58			T4	2.39	2.04	1.77	1.58	1.42
