# Supplementary material for: Dynamics of carbon and nitrogen storage in two typical plantation ecosystems of different stand ages on the Loess Plateau of China
Source: PeerJ. 2019 Sep 18;7:e7708. doi: 10.7717/peerj.7708 (PMC6754723; doi:10.7717/peerj.7708)
Supplement: Supplemental Information 3 [file peerj-07-7708-s003.xlsx]

## Sheet: Sheet1
Table S3 The C/N ratios in different soil layers at each stand age of Robinia pseudoacacia
Age		0-20cm	20-40cm	40-60cm	60-80cm	80-100cm
0	T1	13.087	13.8205	11.6957	11.1364	11.55
	T2	10.7654	13.8605	9.96552	8.62963	9.88462
	T3	13.8871	11.5814	9.84	16.7222	13.7222
	T4	15.25	16.871	17	9.57143	11.1176
8	T1	12.0164	12.4518	13.8734	12.3167	12.5556
	T2	10.0429	13.5429	12.2692	15.4118	14.2143
	T3	12.8148	9.27907	11.9167	8.08	11
	T4	13.6271	15.5806	19.2667	17.1765	12.4737
20	T1	13.8293	12.8689	11.1157	11.0805	10.35
	T2	13.8506	11.4872	13.3556	11.4	9.39583
	T3	13.8533	13.2833	9.62069	12.1818	11.8571
	T4	13.7857	14.0794	11.2619	9.62791	10.1622
38	T1	13.9468	12.8934	12.6138	12.8209	12.6462
	T2	16.6941	12.2088	12.9259	12.4444	13.0882
	T3	12.9798	12.1529	14.1471	13.3425	13.4211
	T4	12.5408	14.8553	10.9444	12.4308	11.7536
58	T1	13.4018	12.0824	13.3907	11.9884	13.4127
	T2	11.5407	11.9394	12.7065	11.5517	14.7903
	T3	13.6796	13.2738	13.1905	14.7681	11.1714
	T4	15.6735	11.172	14.2192	10.0366	14.4138
