# Supplementary material for: Dynamics of carbon and nitrogen storage in two typical plantation ecosystems of different stand ages on the Loess Plateau of China
Source: PeerJ. 2019 Sep 18;7:e7708. doi: 10.7717/peerj.7708 (PMC6754723; doi:10.7717/peerj.7708)
Supplement: Supplemental Information 4 [file peerj-07-7708-s004.xlsx]

## Sheet: Sheet1
Table S4 Soil organic carbon content and organic carbon storage in the different soil layers at each stand age of Pinus tabulaeformis
	carbon content(g kg-1)										carbon storage(Mg ha-1)
Age		0-20cm	20-40cm	40-60cm	60-80cm	80-100cm				Age		0-20cm	20-40cm	40-60cm	60-80cm	80-100cm
0	T1	9.03	5.39	2.69	2.45	2.31				0	T1	1.68	1.04	0.59	0.58	0.49
	T2	8.72	5.96	2.89	2.33	2.57					T2	1.94	1.18	0.68	0.76	0.58
	T3	8.61	4.98	2.46	3.01	2.47					T3	1.23	0.71	0.54	0.45	0.44
	T4	9.76	5.23	2.72	2.01	1.89					T4	1.87	1.23	0.55	0.53	0.45
6	T1	6.50833	3.875	2.55833	2.22	1.91667				6	T1	1.61	0.96	0.58	0.57	0.47
	T2	6.73	4.55	2.49	2.68	2.05					T2	1.89	1.21	0.65	0.52	0.57
	T3	7.03	3.04	2.82	1.65	2.26					T3	1.77	0.78	0.63	0.7	0.43
	T4	5.74	4.04	2.37	2.33	1.44					T4	1.13	0.89	0.46	0.49	0.41
15	T1	9.36667	6.225	3.98	3.43	3.14167				15	T1	1.83	1.13	1.08	0.95	0.93
	T2	10.45	7.22	4.15	3.93	3.89					T2	2.23	1.81	1.39	1.2	1.21
	T3	8.63	5.8	4.44	2.88	2.72					T3	1.65	1.51	1.04	0.87	0.79
	T4	9.02	5.65	3.35	3.48	2.81					T4	1.56	1.57	0.81	0.78	0.91
35	T1	11.2083	7.50833	6.05	4.81667	4.975				35	T1	1.98	1.46	1.41	1.28	1.12
	T2	12.04	8.55	6.73	5.31	5.01					T2	2.51	1.72	1.79	1.65	1.51
	T3	10.16	7.03	6.27	4.22	5.56					T3	1.51	1.11	1.33	1.16	1.04
	T4	11.41	6.95	5.15	4.92	4.35					T4	2.02	1.55	1.11	1.03	0.81
56	T1	14.02	11.275	9.015	7.115	6.5				56	T1	2.12	1.91	1.82	1.65	1.34
	T2	13.63	12.36	9.97	7.85	7.12					T2	2.69	2.15	2.31	2	1.67
	T3	14.98	10.13	8.73	6.45	6.15					T3	1.68	1.54	1.4	1.37	1.13
	T4	13.46	11.35	8.33	7.04	6.23					T4	2.39	2.04	1.75	1.58	1.22
