# Supplementary material for: Dynamics of carbon and nitrogen storage in two typical plantation ecosystems of different stand ages on the Loess Plateau of China
Source: PeerJ. 2019 Sep 18;7:e7708. doi: 10.7717/peerj.7708 (PMC6754723; doi:10.7717/peerj.7708)
Supplement: Supplemental Information 5 [file peerj-07-7708-s005.xlsx]

## Sheet: Sheet1
Table S5 Soil nitrogen content and storage in the different soil layers at each stand age of Pinus tabulaeformis
	nitrogen content(g kg-1)										nitrogen storage(Mg ha-1)
Age		0-20cm	20-40cm	40-60cm	60-80cm	80-100cm				Age		0-20cm	20-40cm	40-60cm	60-80cm	80-100cm
0	T1	0.69	0.39	0.23	0.22	0.2				0	T1	1.68	1.04	0.59	0.58	0.49
	T2	0.81	0.43	0.29	0.27	0.26					T2	1.94	1.18	0.68	0.76	0.58
	T3	0.62	0.43	0.25	0.18	0.18					T3	1.23	0.71	0.54	0.45	0.44
	T4	0.64	0.31	0.16	0.21	0.17					T4	1.87	1.23	0.55	0.53	0.45
6	T1	0.58	0.35	0.21	0.21	0.17				6	T1	1.61	0.96	0.58	0.57	0.47
	T2	0.67	0.25	0.27	0.18	0.15					T2	1.89	1.21	0.65	0.52	0.57
	T3	0.47	0.39	0.16	0.25	0.22					T3	1.77	0.78	0.63	0.7	0.43
	T4	0.6	0.41	0.2	0.2	0.14					T4	1.13	0.89	0.46	0.49	0.41
15	T1	0.71	0.45	0.39	0.32	0.29				15	T1	1.83	1.13	1.08	0.95	0.93
	T2	0.81	0.55	0.47	0.4	0.33					T2	2.23	1.81	1.39	1.2	1.21
	T3	0.64	0.38	0.34	0.28	0.25					T3	1.65	1.51	1.04	0.87	0.79
	T4	0.68	0.42	0.36	0.28	0.29					T4	1.56	1.57	0.81	0.78	0.91
35	T1	0.83	0.54	0.51	0.47	0.44				35	T1	1.98	1.46	1.41	1.28	1.12
	T2	0.89	0.59	0.62	0.53	0.48					T2	2.51	1.72	1.79	1.65	1.51
	T3	0.75	0.58	0.49	0.4	0.46					T3	1.51	1.11	1.33	1.16	1.04
	T4	0.85	0.45	0.42	0.48	0.38					T4	2.02	1.55	1.11	1.03	0.81
56	T1	1.01	0.81	0.67	0.61	0.58				56	T1	2.12	1.91	1.82	1.65	1.34
	T2	1.42	0.87	0.73	0.69	0.66					T2	2.69	2.15	2.31	2	1.67
	T3	0.92	0.82	0.58	0.54	0.55					T3	1.68	1.54	1.4	1.37	1.13
	T4	0.69	0.74	0.7	0.6	0.53					T4	2.39	2.04	1.75	1.58	1.22
