# Supplementary material for: Dynamics of carbon and nitrogen storage in two typical plantation ecosystems of different stand ages on the Loess Plateau of China
Source: PeerJ. 2019 Sep 18;7:e7708. doi: 10.7717/peerj.7708 (PMC6754723; doi:10.7717/peerj.7708)
Supplement: Supplemental Information 6 [file peerj-07-7708-s006.xlsx]

## Sheet: Sheet1
Table S6 The C/N ratios in different soil layers at each stand age of Pinus tabulaeformis
Age		0-20cm	20-40cm	40-60cm	60-80cm	80-100cm
0	T1	13.087	13.8205	11.6957	11.1364	11.55
	T2	10.7654	13.8605	9.96552	8.62963	9.88462
	T3	13.8871	11.5814	9.84	13.7222	13.7222
	T4	15.25	14.871	12.11	9.57143	11.1176
6	T1	11.2213	11.0714	12.1825	10.5714	11.2745
	T2	10.0448	13.2	9.22222	13.8889	13.6667
	T3	14.9574	9.79487	12.625	9.61	10.2727
	T4	9.56667	9.85366	11.85	11.65	10.2857
15	T1	13.1925	13.8333	10.2051	10.7188	10.8333
	T2	12.9012	13.1273	8.82979	9.825	11.7879
	T3	13.4844	15.2632	13.0588	10.2857	10.88
	T4	13.2647	13.4524	9.30556	12.4286	9.68966
35	T1	13.504	13.9043	11.8627	10.2482	11.3068
	T2	13.5281	14.4915	10.8548	10.0189	10.4375
	T3	13.5467	12.1207	12.7959	10.55	12.087
	T4	13.4235	15.4444	12.2619	10.25	11.4474
56	T1	13.8812	13.9198	13.4552	11.6639	11.2069
	T2	9.59859	14.2069	13.6575	11.3768	10.7879
	T3	13.2826	12.3537	15.0517	11.9444	11.1818
	T4	12.5072	15.3378	11.9	11.7333	11.7547
